# Supplementary material for: The IAP Antagonist SM-164 Eliminates Triple-Negative Breast Cancer Metastasis to Bone and Lung in Mice
Source: PubMed Central journal article supplement (PMC7181667; doi:10.1038/s41598-020-64018-z), 2020-04-24
Supplement: 41598_2020_64018_MOESM1_ESM.pdf [file 41598_2020_64018_MOESM1_ESM.pdf]

The IAP Antagonist SM-164 Eliminates Triple-Negative Breast Cancer Metastasis to  
Bone and Lung in Mice

**Wei Lei<sup>1,2</sup>, Rong Duan<sup>1</sup>, Jinbo Li<sup>1</sup>, Xin Liu<sup>1</sup>, Alissa Huston<sup>3</sup>, Brendan F. Boyce<sup>1</sup>,  
Zhenqiang Yao<sup>1</sup> \***

**Affiliations:** <sup>1</sup>Department of Pathology and Laboratory Medicine, and Center for Musculoskeletal Research, University of Rochester Medical Center, Rochester, NY 14642, USA;

<sup>2</sup>Department of Medical Imaging, Henan University First Affiliated Hospital, 357 Ximen Street, Kaifeng, Henan 475001, P.R. China. <sup>3</sup>Department of Medicine, Hematology/Oncology, University of Rochester Medical Center, Rochester, NY 14642, USA.

**Supplementary data**

**Supplementary Fig. 1.**

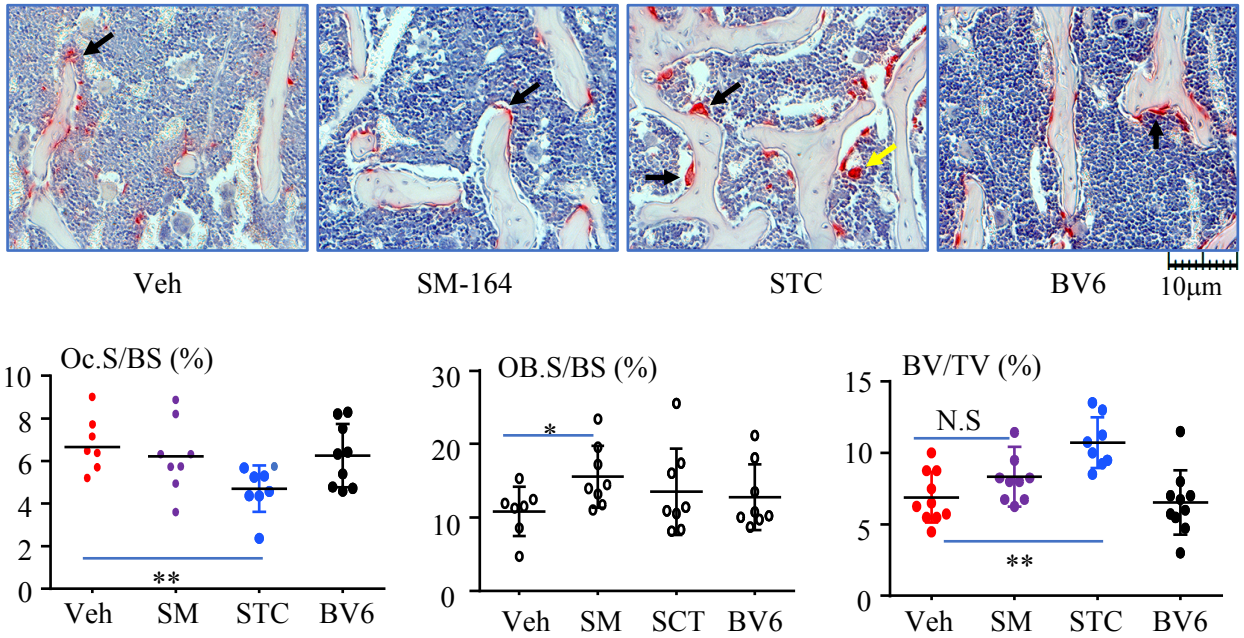

**Supplementary Fig. 1. SM-164 does not affect bone turnover or bone mass in vertebrae without metastases.** TRAP-stained sections of vertebrae without metastases, as in Figs. 1&2, were used to evaluate OC and OB surfaces and trabecular BV/TV in the metaphyseal bone adjacent to the end plates. Arrows indicate osteoclasts on bone surfaces. Osteoclasts are larger in the STC-treated mice than in the other groups and some are detached from the bone surface and have a rounded appearance (yellow arrow), typical of apoptotic osteoclasts. Bone volume values are higher in the SCT-treated mice, reflecting the inhibitory effects of zoledronate on osteoclast activity and survival. Veh (vehicle); SM (SM-164); SCT (standard chemotherapy).

Supplementary Figure 2

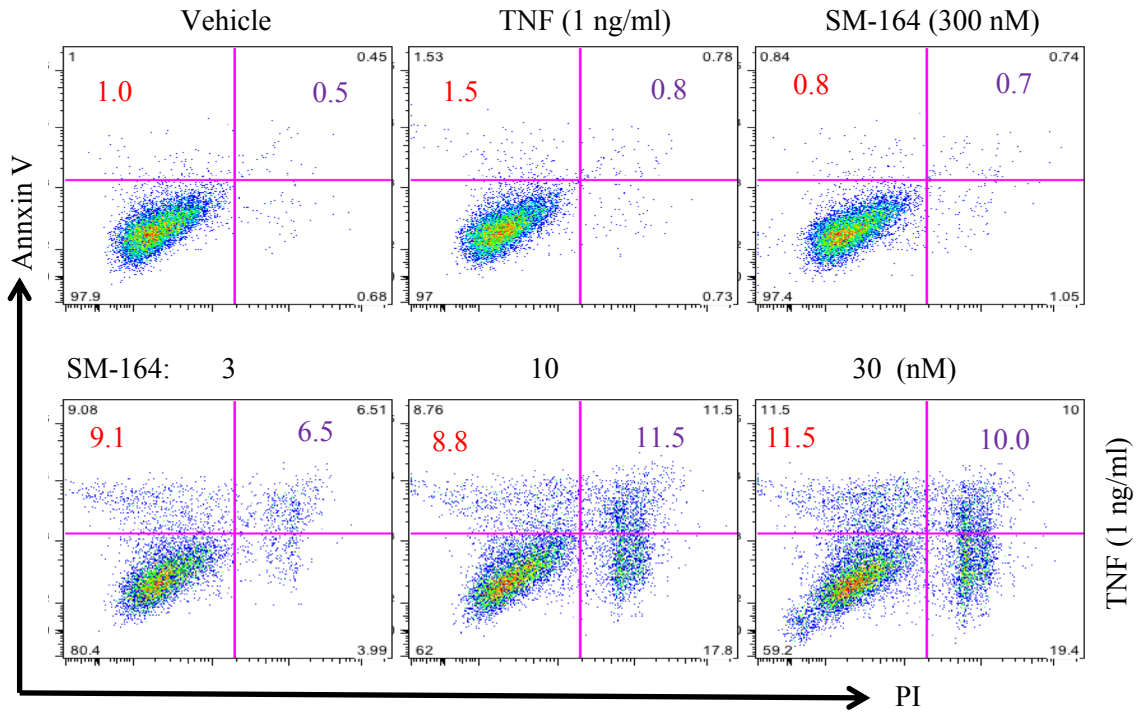

**Supplementary Fig. 2. TNF triggers SM-164-induced MCF7 cell apoptosis.** MCF7 breast cancer cells were treated with the indicated doses of SM-164 +/- 1 ng/ml of TNF overnight. Cells were stained with Annexin V and PI to analyze Annexin V<sup>+</sup>PI<sup>+</sup> apoptotic cells by flow cytometry. The experiments were repeated at least twice with similar results.

Supplementary Figure 3

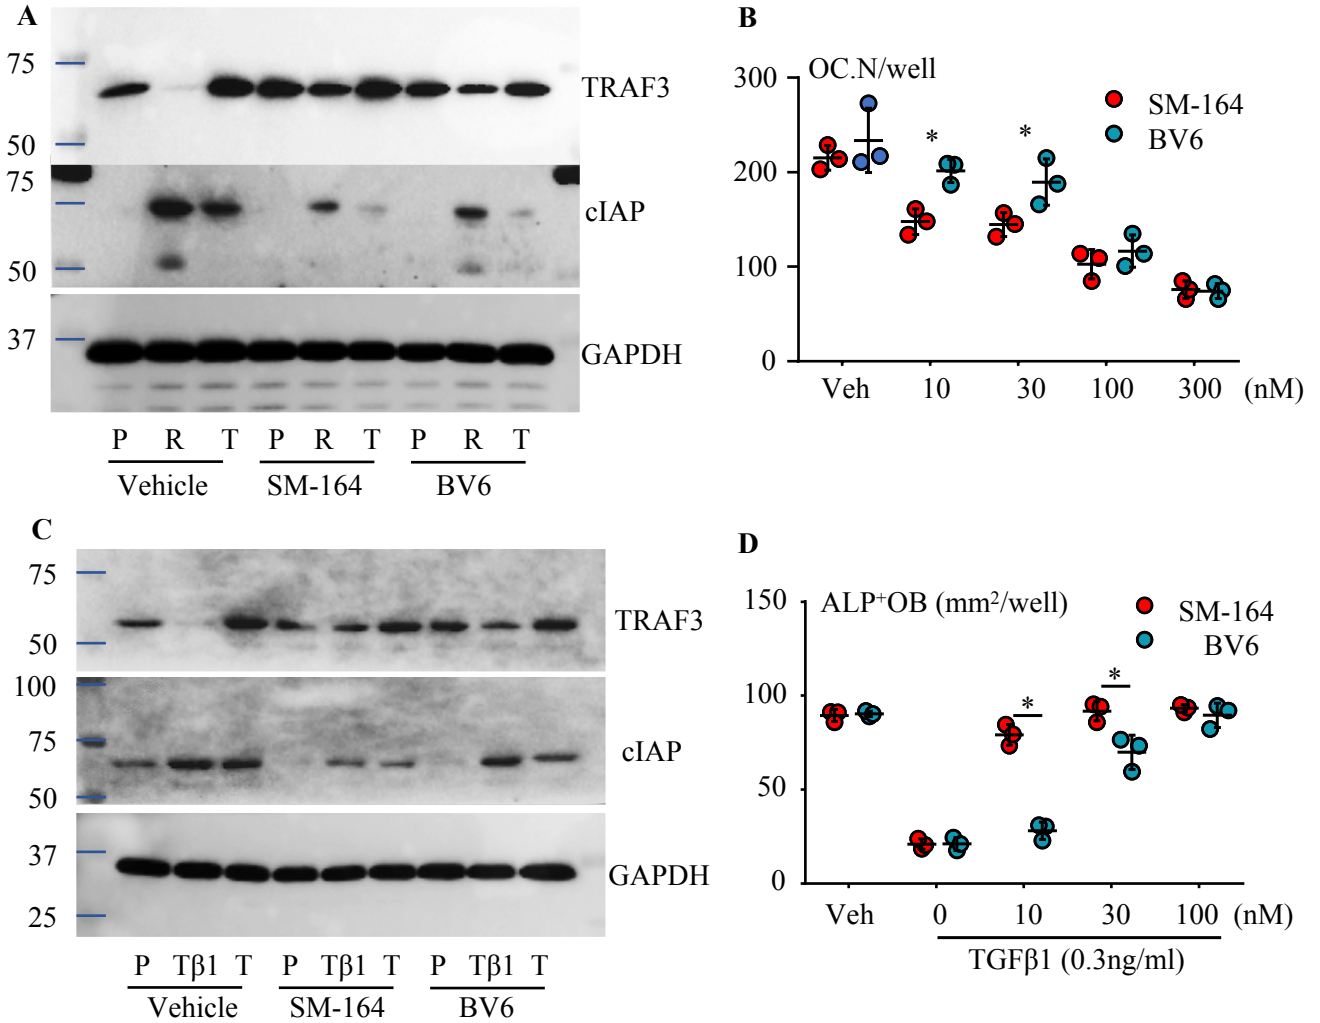

**Supplementary Fig. 3. SM-164 more effectively inhibits OC and stimulates OB differentiation than BV6 by preventing TRAF3 degradation.** (A) WT mouse BM cells were cultured with M-CSF to generate macrophages followed by treatment with PBS (P), RANKL (R) or TNF (T) plus vehicle, SM-164 or BV6 10 nM for 8 hrs. cIAP1/2 and TRAF3 protein levels were assessed by WB. (B) WT mouse BM cells were cultured with M-CSF and 10 ng/ml RANKL plus the indicated doses of SM-164 or BV6 for 4 days. TRAP<sup>+</sup> OC numbers were counted. \* p<0.05 vs. same dose of BV6. (C) WT mouse BdmSCs were treated with 1ng/ml TGFβ1 (Tβ1), or 3 ng/ml TNFα (T), +/- SM-164 (10 nM). Cell lysates were subjected to WB analysis of TRAF3, cIAP and β-actin. (D) BdmSCs from WT mice were induced for OB differentiation in the presence of the indicated doses of SM-164 or BV6 for 7 d. ALP<sup>+</sup> OB area was evaluated. \* p<0.05 vs. same dose of BV6.

**Supplementary Fig. 4.**

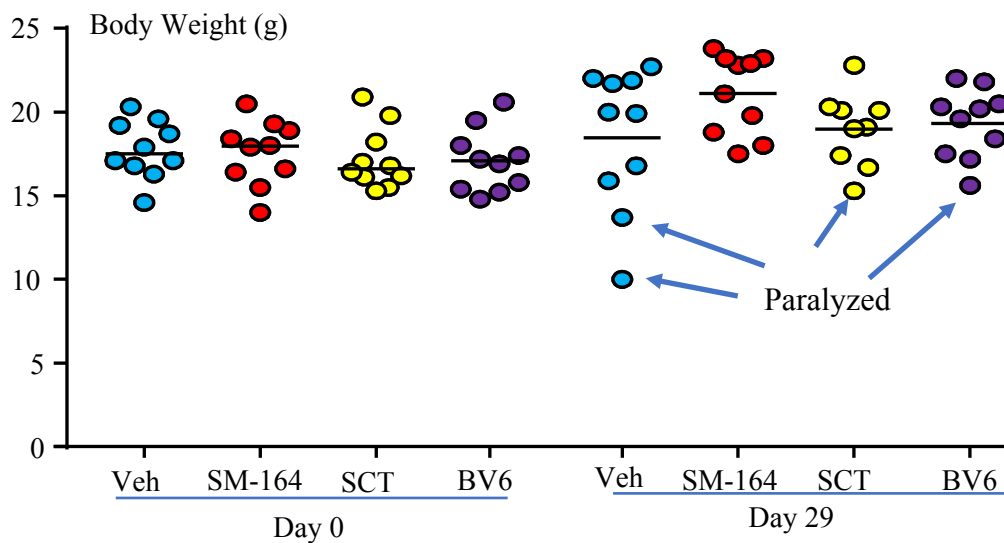

**Supplementary Fig. 4. Effect of SM-164, standard chemotherapy (SCT) and BV6 on body weight of mice with metastases.** Mice were weighed at the beginning and end of the experiment as Fig.1 &2. Arrows indicate mice that were paralyzed at time of euthanasia.

Supplementary Figure 5

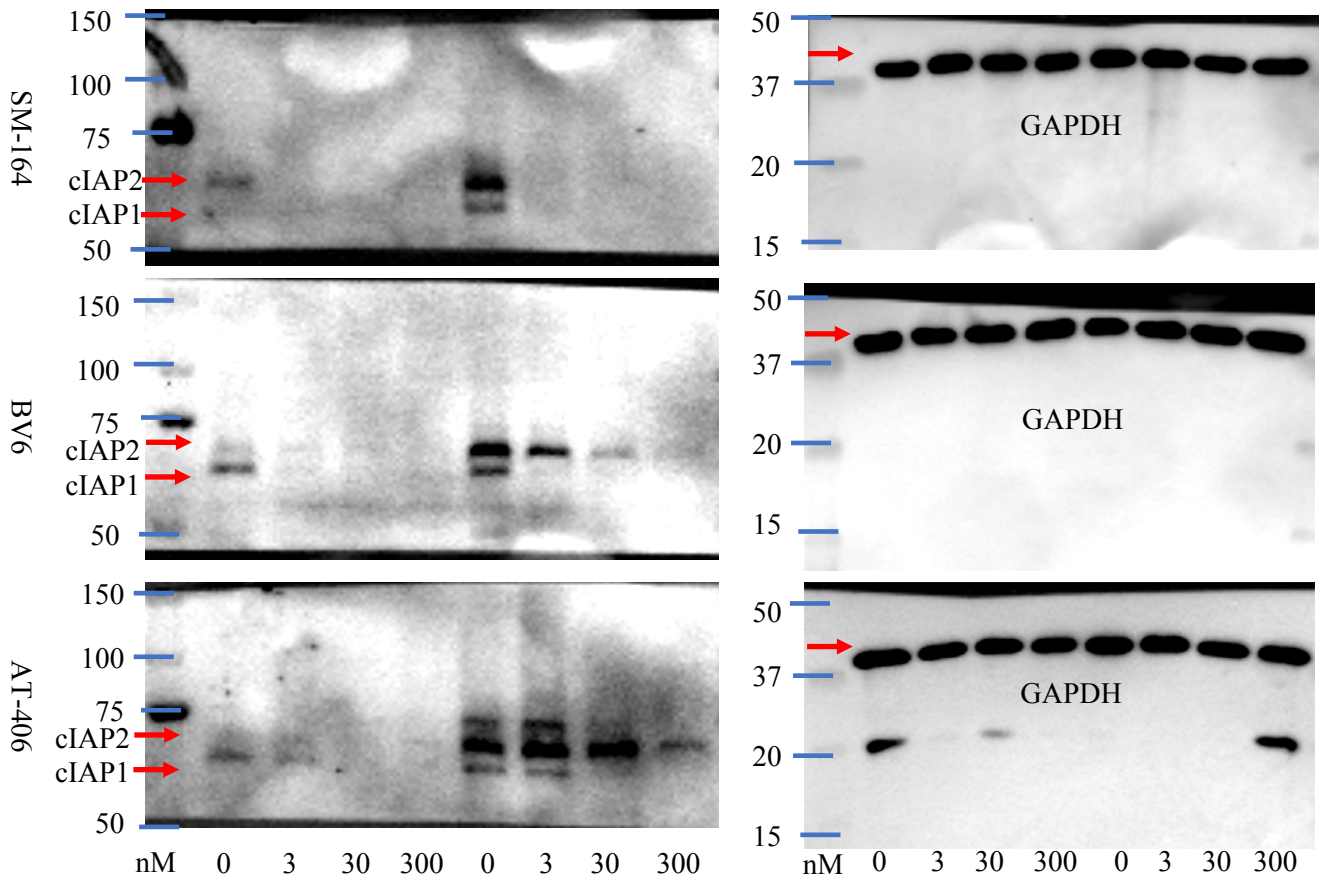

Full length gels of images presented in Fig. 4B

Supplementary Figure 6

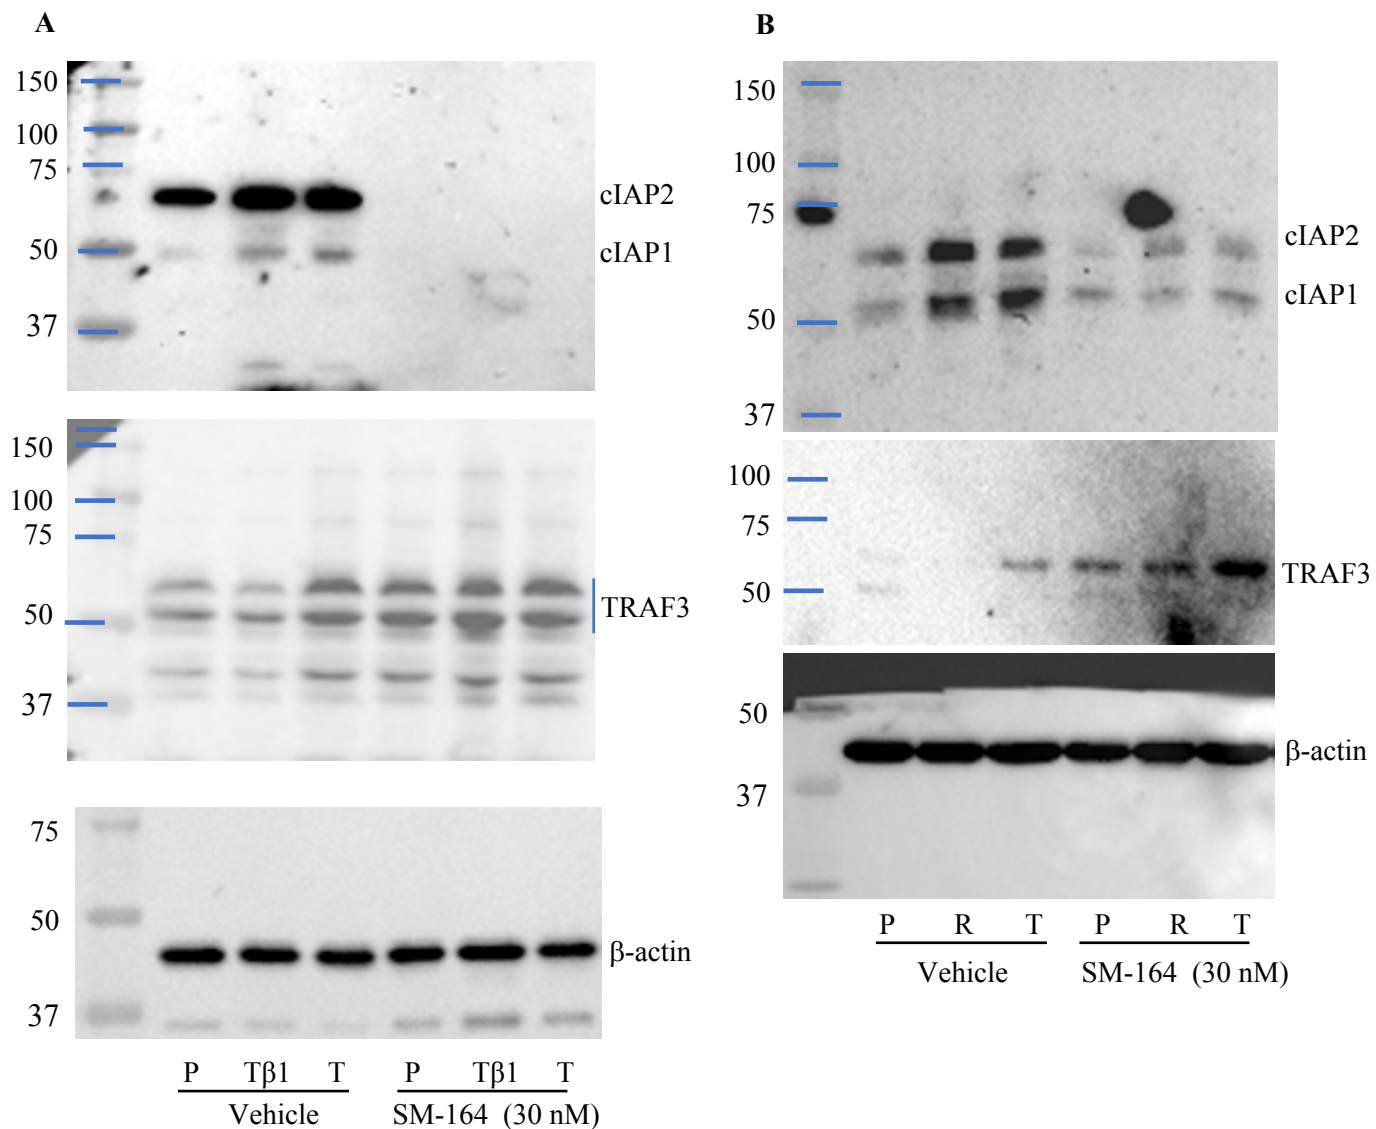

Full length gels of images presented in Fig. 5C (A) and Fig. 5D (B). T $\beta$ 1 (TGF $\beta$ 1) 1 ng/ml; T (TNF $\alpha$ ) 1 ng/ml.
